# Supplementary material for: Green electrochemical nanosensor platform design for mexiletine detection based on Citrus reticulata peel-mediated iron nanoparticles and quantum dots and investigation of the adsorption mechanism by the DFT-D3 method
Source: Royal Society of Chemistry journal article supplement (doi:10.1039/d3nj04335e), 2024-01-01
Supplement: d3nj04335e1.pdf [file d3nj04335e1.pdf]

## Supplementary material

**Green electrochemical nanosensor platform design for mexiletine detection based on *Citrus reticulata* peels mediated iron nanoparticles and quantum dots and investigation of adsorption mechanism by DFT-D3 method**

**Ipek Kucuk<sup>1,2</sup>, Cigdem Kanbes-Dindar<sup>1</sup>, Didem Nur Unal<sup>1,2</sup>, Burcin Bozal-Palabiyik<sup>1</sup>, Arzu Karayel<sup>3\*</sup>, Bengi Uslu<sup>1\*</sup>**

<sup>1</sup>Ankara University, Faculty of Pharmacy, Department of Analytical Chemistry, 06560, Ankara, Türkiye

<sup>2</sup>Ankara University, The Graduate School of Health Sciences, 06110, Ankara, Türkiye

<sup>3</sup>Hitit University, Faculty of Arts and Sciences, Department of Physics, Çorum, Türkiye

---

\*Corresponding author email: buslu@pharmacy.ankara.edu.tr, karayelarzu@gmail.com

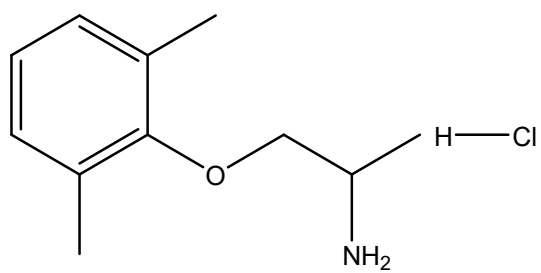

**Figure. S1.** Chemical structure of MXL.

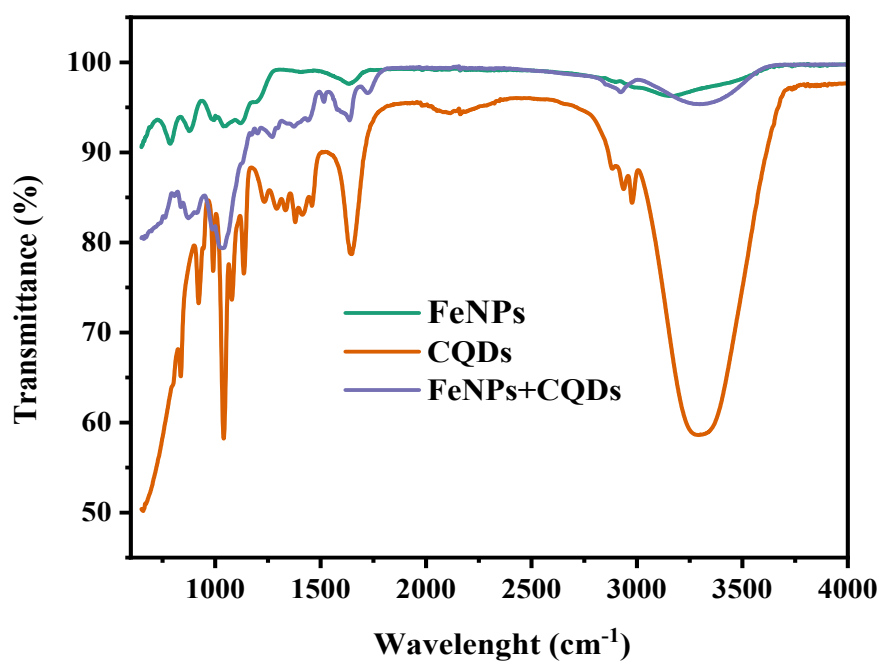

**Figure. S2.** FTIR spectrum of green FeNPs, CQDs and FeNPs-CQDs composite.

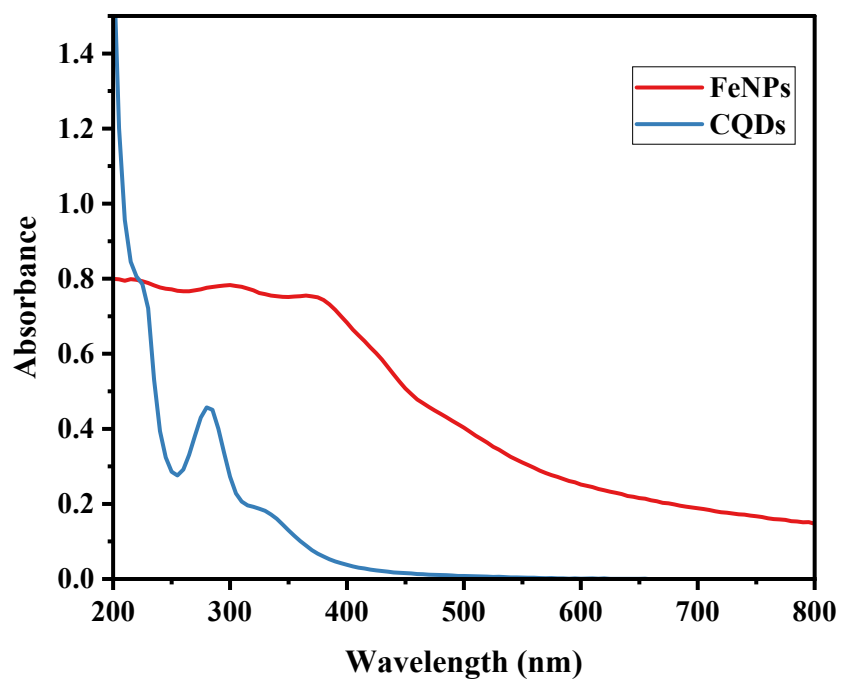

**Figure. S3.** UV-vis spectrum of green FeNPs and CQDs.

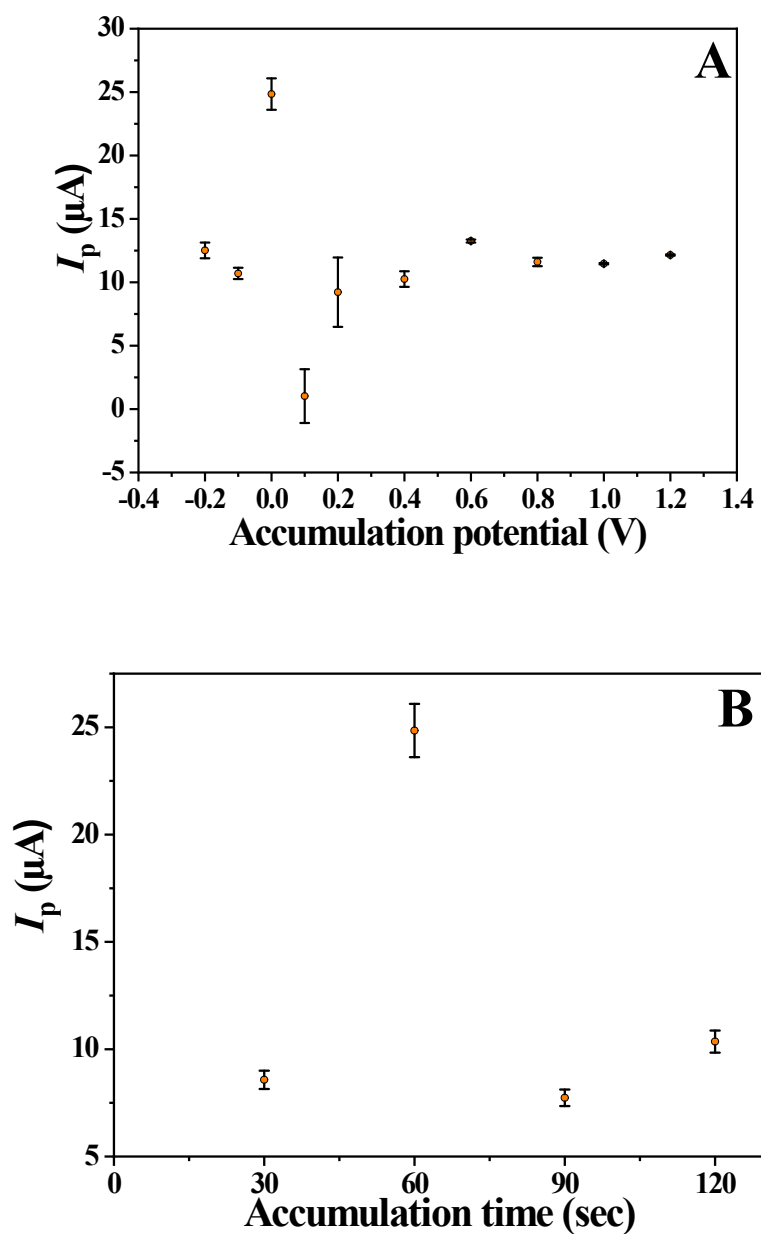

**Figure. S4.** Effect of accumulation potential (accumulation time: 60 s) (A) and time (accumulation potential: 0 V) (B) on MXL signal at CQDs/FeNPs/GCE.

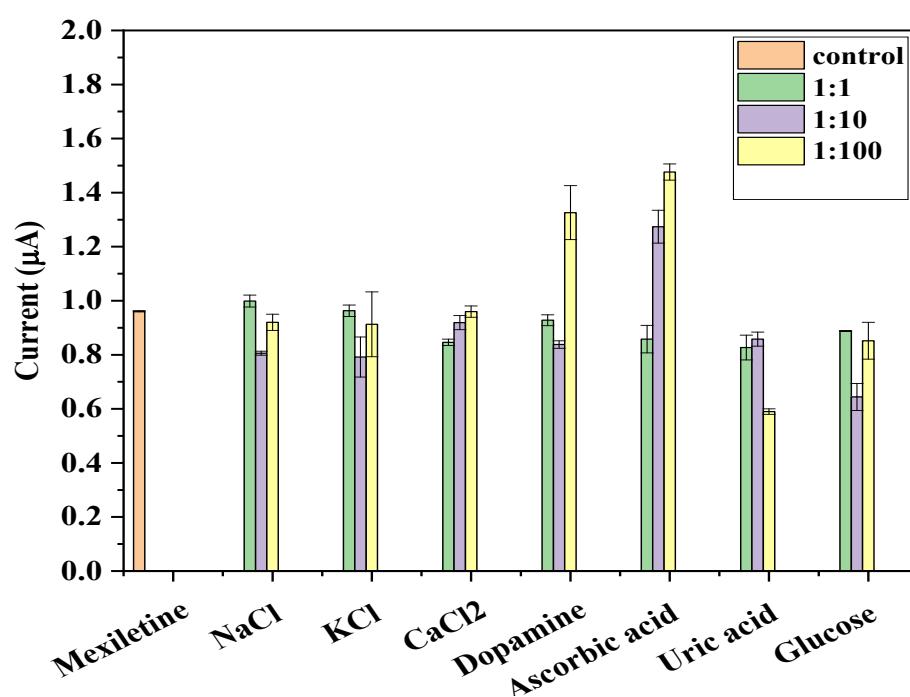

**Figure. S5.** Interference effect of different compounds onto the MXL signal in the molar ratio of 1:1, 1:10 and 1:100.

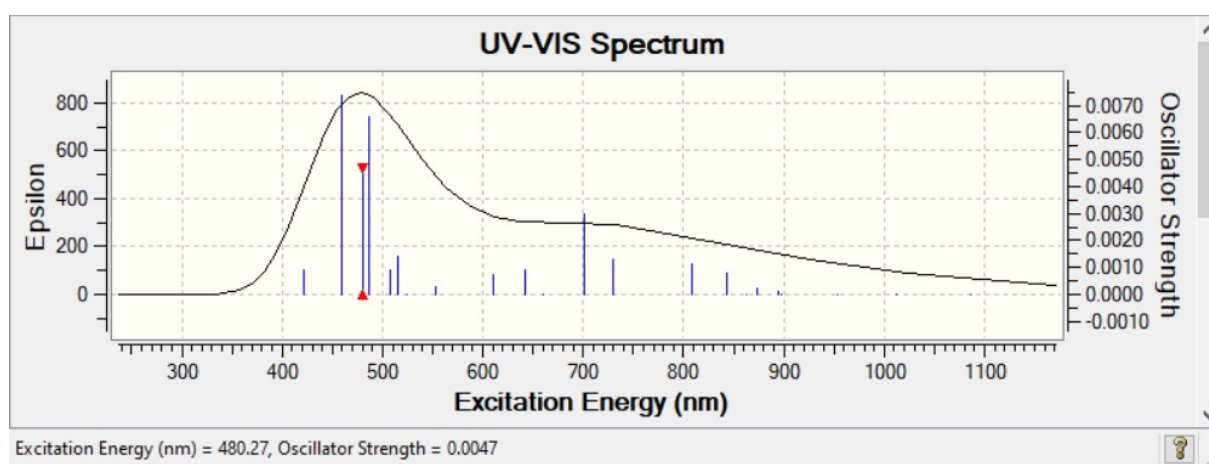

**Figure. S6.** Calculated UV-vis spectrum of  $\text{Fe}_2\text{O}_3-(\text{OH})_4$  at B3LYP-D3/LanL2DZ level.

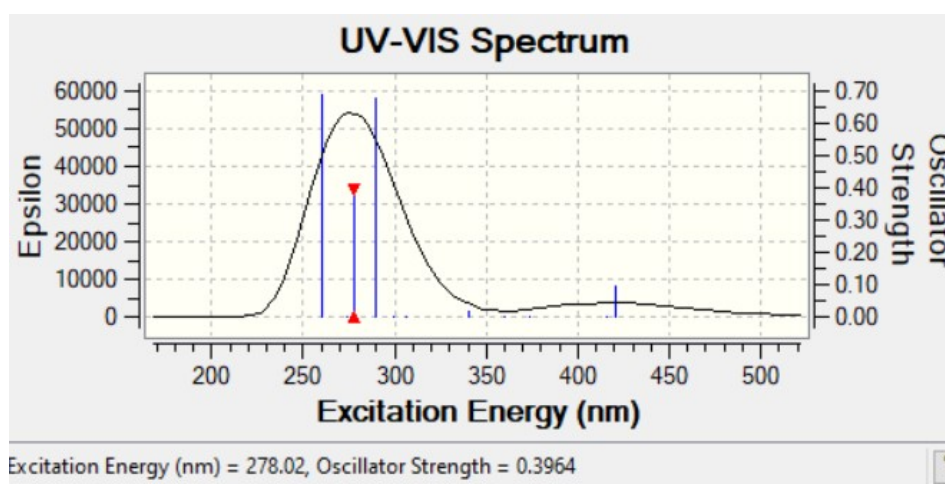

**Figure. S7.** Calculated UV-vis spectrum of CQDs at B3LYP-D3/LanL2DZ level.

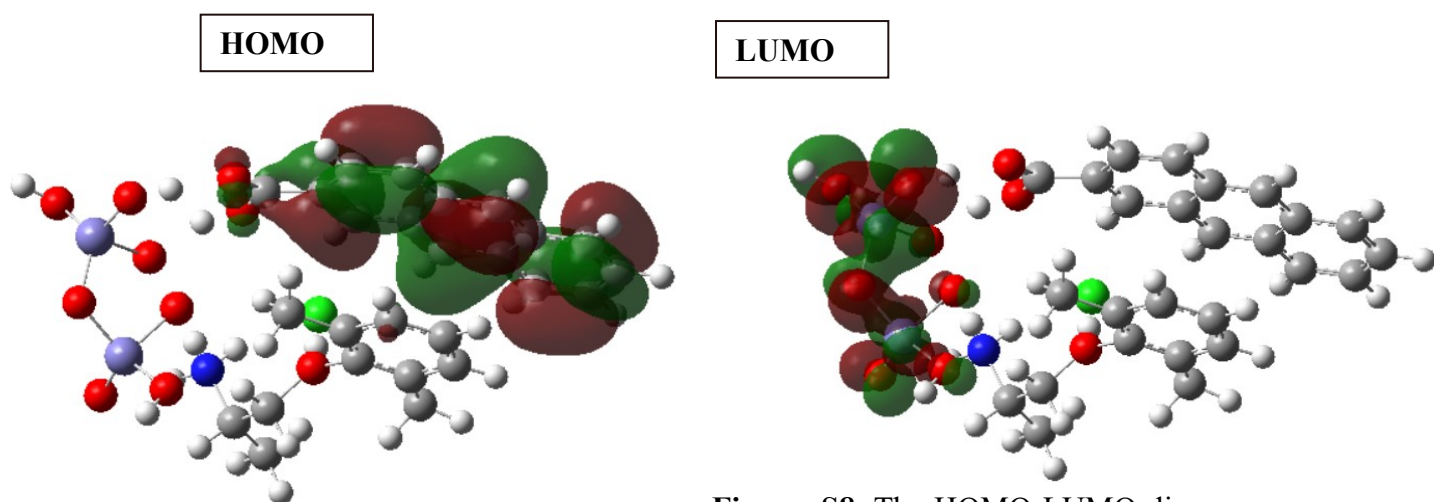

**Figure. S8.** The HOMO-LUMO diagrams of the complex at B3LYP-D3/LanL2DZ level in solvent phase. Atom colors: carbon in gray, nitrogen in dark-blue, oxygen in red, chlorine in green, iron in purple and hydrogen in white.

**Table S1.** XYZ coordinates of CQDs (X, Y, and Z in Å).

|   |             |             |            |
|---|-------------|-------------|------------|
| C | -2.68093400 | 0.07769900  | 0.00000600 |
| C | -1.61922000 | -0.81497400 | 0.00001600 |
| C | -0.26602900 | -0.34220200 | 0.00001100 |

|   |             |             |             |
|---|-------------|-------------|-------------|
| C | -0.02119900 | 1.09122300  | -0.00000600 |
| C | -1.15187300 | 1.98426700  | -0.00001600 |
| C | -2.44120200 | 1.49918200  | -0.00001300 |
| C | 0.82932400  | -1.23138800 | 0.00002000  |
| C | 1.30654600  | 1.55972000  | -0.00001200 |
| C | 2.40353200  | 0.67133300  | -0.00000500 |
| C | 2.15853200  | -0.76185500 | 0.00001200  |
| C | 3.28454100  | -1.65788900 | 0.00001800  |
| H | 3.09912200  | -2.73004300 | 0.00003200  |
| C | 4.57807100  | -1.17016500 | 0.00000800  |
| C | 4.82031100  | 0.24675200  | -0.00000900 |
| C | 3.76377000  | 1.13898300  | -0.00001400 |
| H | 0.64296900  | -2.30407700 | 0.00003700  |
| H | -1.81477300 | -1.88311200 | 0.00003500  |
| H | -0.96924000 | 3.05649500  | -0.00002700 |
| H | -3.30045700 | 2.16283200  | -0.00003100 |
| H | 1.49183600  | 2.63251800  | -0.00001900 |
| H | 5.42285400  | -1.85431000 | 0.00001000  |
| H | 5.84479900  | 0.61062700  | -0.00001500 |
| H | 3.94759700  | 2.21137100  | -0.00002500 |
| C | -4.08804000 | -0.38282100 | 0.00000600  |
| O | -5.09160100 | 0.35520700  | 0.00008400  |
| O | -4.21535800 | -1.77101800 | -0.00009000 |
| H | -5.16582000 | -2.02301000 | -0.00007600 |

**Table S2.** XYZ coordinates of Fe<sub>2</sub>O<sub>3</sub> NPs (X, Y, and Z in Å).

|    |             |             |             |
|----|-------------|-------------|-------------|
| Fe | 1.42973900  | -0.02819300 | -0.24667400 |
| O  | 0.80335500  | 0.27148700  | 1.46820800  |
| O  | -0.63194900 | 0.21844100  | 1.52654700  |



|    |             |             |             |
|----|-------------|-------------|-------------|
| O  | -0.07043100 | 0.09305100  | -1.02030700 |
| Fe | -1.52958000 | 0.01110300  | 0.07543400  |
| O  | 2.10949800  | -1.60304800 | -0.02211500 |
| H  | 2.46277600  | -2.05656300 | -0.82585000 |
| O  | 2.48346200  | 1.34041700  | -0.33705900 |
| H  | 2.54794500  | 1.90572900  | 0.46778500  |
| O  | -2.37622200 | 1.38243800  | -0.53935700 |
| H  | -2.02219800 | 1.81520100  | -1.35054200 |
| O  | -2.02047300 | -1.60619700 | -0.32897700 |
| H  | -2.77055700 | -1.99274200 | 0.18533800  |

**Table S3.** XYZ coordinates of MXL (X, Y, and Z in Å).

|   |            |             |             |
|---|------------|-------------|-------------|
| C | 1.85257060 | 1.20094442  | 0.30121568  |
| C | 1.02356684 | 0.12952308  | -0.08130651 |
| C | 1.50015133 | -1.12971188 | -0.49938918 |

|    |             |             |             |
|----|-------------|-------------|-------------|
| C  | 2.90041763  | -1.29651141 | -0.54896037 |
| C  | 3.76501436  | -0.24802885 | -0.18404696 |
| C  | 3.24583057  | 0.98792805  | 0.24304666  |
| H  | 3.30822785  | -2.25346927 | -0.86590737 |
| H  | 4.84132454  | -0.39702318 | -0.22353804 |
| H  | 3.91871765  | 1.78959402  | 0.53871543  |
| C  | 1.26689979  | 2.52279490  | 0.75680766  |
| H  | 1.03937021  | 3.17322652  | -0.10028915 |
| H  | 0.33504001  | 2.37103266  | 1.31168497  |
| H  | 1.97270681  | 3.06092831  | 1.39868786  |
| C  | 0.54685653  | -2.26049525 | -0.83130680 |
| H  | -0.32692722 | -1.91785547 | -1.39765108 |
| H  | 1.05620642  | -3.04170651 | -1.40579576 |
| H  | 0.15759579  | -2.70967653 | 0.09184650  |
| O  | -0.39587670 | 0.31610096  | -0.01162579 |
| C  | -1.03646012 | 0.88728751  | -1.23180879 |
| C  | -2.55799263 | 0.71177522  | -1.15890179 |
| N  | -2.89569126 | -0.72478187 | -1.20460566 |
| H  | -3.81700705 | -0.91959787 | -1.58729117 |
| H  | -2.74077708 | -1.21436442 | -0.32357427 |
| C  | -3.17959217 | 1.48983500  | 0.03020271  |
| H  | -4.27345832 | 1.41847019  | -0.00981392 |
| H  | -2.90329834 | 2.55321595  | -0.00089363 |
| H  | -2.85003578 | 1.07188240  | 0.98728750  |
| H  | -0.75374540 | 1.94612050  | -1.27473111 |
| H  | -0.63547700 | 0.34671242  | -2.09546108 |
| H  | -2.92857565 | 1.15874565  | -2.09438320 |
| Cl | -1.58396219 | -1.26103110 | 1.99161807  |
| H  | -0.99925425 | -0.42608593 | 0.94553249  |
